# Supplementary material for: RIP140 Represses the “Brown-in-White” Adipocyte Program Including a Futile Cycle of Triacyclglycerol Breakdown and Synthesis
Source: PubMed Central journal article supplement (PMC4207910; doi:10.1210/me.2013-1254), 2014-01-30
Supplement: me-13-1254.pdf [file me-13-1254.pdf]

### Supplementary Figure 1

A) **Ucp1 and Cidea gene expression in white and brown adipose tissues.** Gene expression was determined in subcutaneous white adipose tissue (WAT) and interscapular brown adipose tissue (BAT). Tissues were collected from wild type (WT), RIP140-/+ and RIP140-/- mice. Expression is presented relative to WT WAT. \* $p < 0.05$  Student's t test in comparison to WT for each tissue.

B) **RIP140 protein expression in RIP140-transgenic white adipose tissue.** Protein extracts from subcutaneous white adipose tissue from wild type (WT) and RIP140 transgenic (TG) mice were separate by SDS-PAGE, transferred to PVDF membrane and exposed to anti-RIP140 (6D7) or anti- $\beta$ -actin antibody (Abcam). Bands were visualised with ECL2 (Thermo Scientific Pierce).

### Supplementary Figure 2

**Histology of RIP140 Knockout Brown Adipose Tissue.** Representative images of hematoxylin and eosin (H&E) staining performed on brown adipose tissue (BAT) sections from wild type and RIP140 knockout (KO) mice (top row). UCP1 (middle row) and CIDEA staining (lower row) did not showed clear differences in BAT obtained from wild type in comparison to KO mice. Scale bar 200 $\mu$ m apply to H & E and 100 $\mu$ m to middle and lower panels.

A

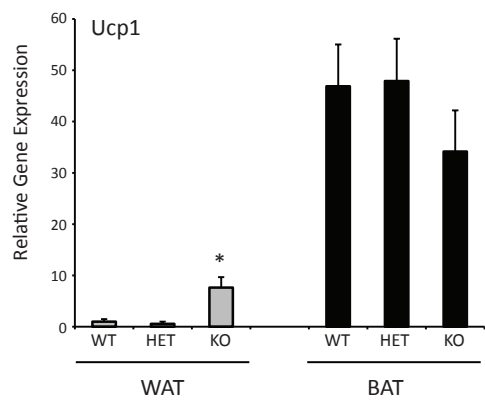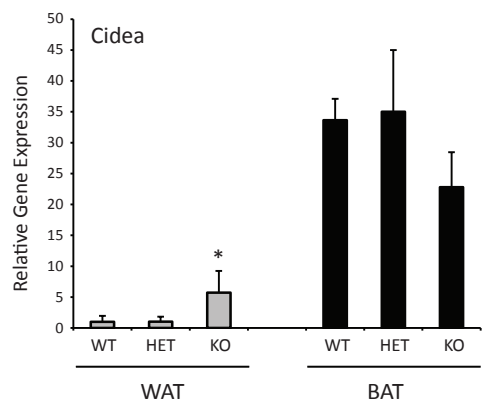

B

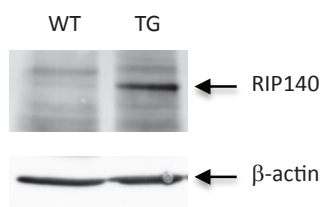

Wild Type

RIP140 KO

H & E

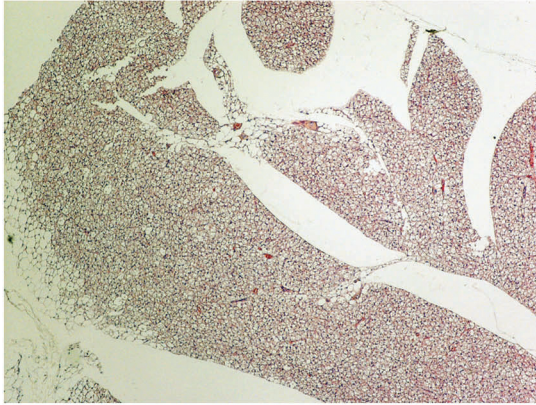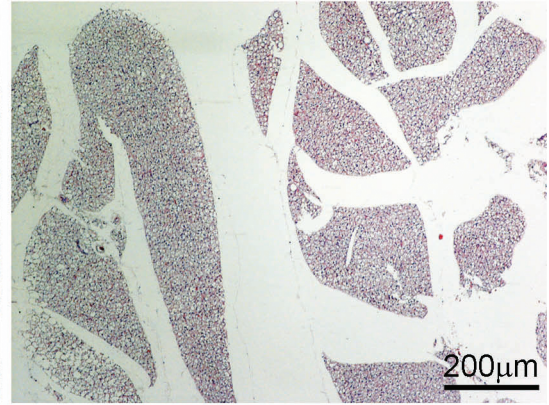

UCP1

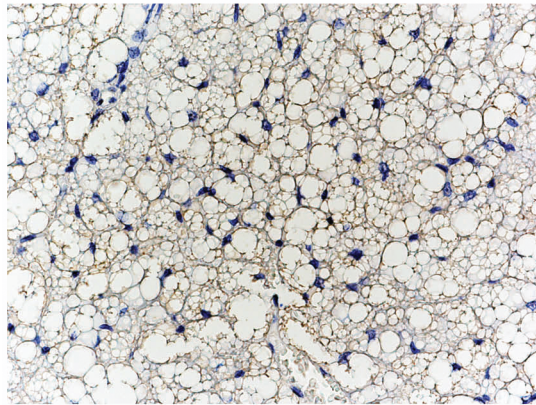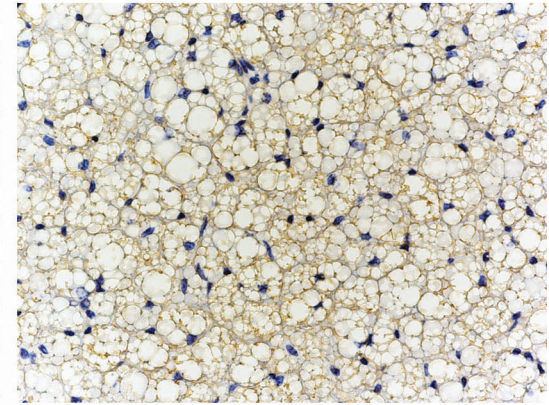

CIDEA

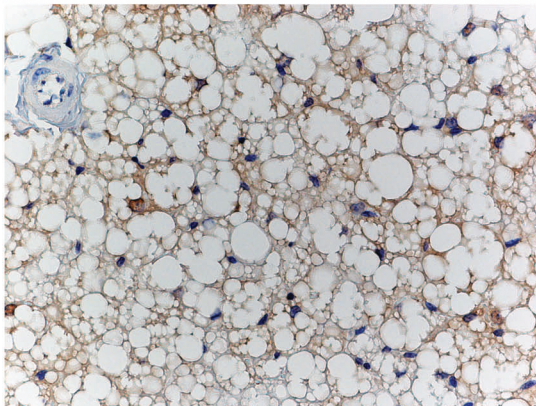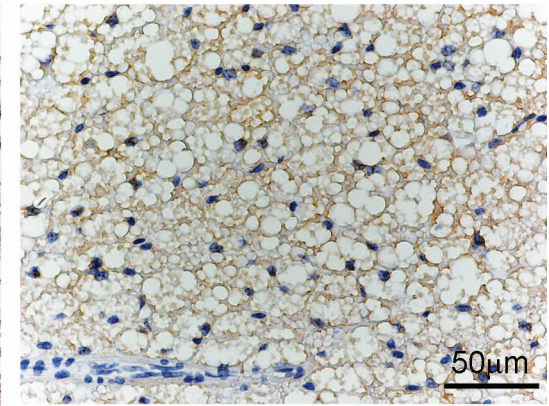

**Supplementary Table 1. Sequences of primers used for Q-RT-PCR**

|                                | <b>Forward Primer (5' to 3')</b> | <b>Reverse Primer (5' to 3')</b> |
|--------------------------------|----------------------------------|----------------------------------|
| <b>ACC1</b>                    | TGTCCACCCAAGCATTCTTC             | CATCCAACACCAGTTCAGTATACGT        |
| <b>ACC2</b>                    | ACTTTGACCTGACCGCTGTG             | CTGAGTGCCGGATAATGGC              |
| <b>aP2</b>                     | ACACCGAGATTTCTTCAAACCTG          | CCATCTAGGGTTATGATGCTCTTCA        |
| <b>Bmp8b</b>                   | ACCCCGCAGCCTCACTTGGACC           | TGGCTCCTGGTAGCCAGGGT             |
| <b>Cd137</b>                   | CGTGCAGAACTCCTGTGATAAC           | GTCCACCTATGCTGGAGAAGG            |
| <b>Cidea</b>                   | AAGCTTCAAGGCCGTGTTA              | CTGTAGCTGTGCCCTGGTTA             |
| <b>Cpt1b</b>                   | ACCACATCCGCCAAGCA                | TTCTCAGCTGTCTGTCTTGGGA           |
| <b>Elovl6</b>                  | TGTGCTCAGCAAAGCACCCGA            | TGTGGTGGTACCAGTGCAGGA            |
| <b>Ehmt1</b>                   | GGCACCTTTGTCTGCGAATAC            | AGAACCAGCGTCAATGCAG              |
| <b>FAS</b>                     | TGCGGAAACTTCAGGAAATGT            | AGAGACGTGTCACTCCTGGACTT          |
| <b>Gpd1</b>                    | GCAAGATCTGTGACCAGCTCAA           | GCCCTCGTCTACCCCCTTAA             |
| <b>Gpd2</b>                    | CCACGGTGGTGTGCGATAC              | AGGGCTTCTTTACCATCCTATACT         |
| <b>Gpr120</b>                  | ACATTGGATTGGCCCAACCGCA           | TCCGCGATGCTTTCTGTGATCTGT         |
| <b>Gyk</b>                     | TCCAACATCAAAGCCATTGGT            | AGAGGCTCTCCGGTGACCTT             |
| <b>HSL</b>                     | CGAGACAGGCCCTCAGTGTGA            | TCTGGGTCTATGGCGAATCG             |
| <b>L19</b>                     | GGAAAAAGAAGGTCTGGTTGGA           | TGATCTGCTGACGGGAGTTG             |
| <b>LETM1</b>                   | CCCGGGCCATGTACCTCCCA             | CCTGGGCCTCCTTTGCCACA             |
| <b>Pdk4</b>                    | TGACTCAAAGACGGGAAACC             | ACTGGTCGCAGAGCATCTTT             |
| <b>PGC-1a</b>                  | CCCTGCCATTGTTAAGACC              | TGCTGCTGTTCTCTGTTTTC             |
| <b>Plin5</b>                   | TCCTGCCCGTCAAAGGGATCTGA          | GGACATTCTGCTGTGTGGCGCT           |
| <b>PPARa</b>                   | GCGTACGGCAATGGCTTTAT             | GAACGGCTTCCTCAGGTTCTT            |
| <b>PPAR<math>\gamma</math></b> | GTGCCAGTTTCGATCCGTAGA            | GGCCAGCATCGTGTAGATGA             |
| <b>Prdm16</b>                  | CAGCACGGTGTACCCAT                | CCGGTGCATCCGGTTGTC               |
| <b>Ptgds</b>                   | GGCTCCTGGACACTACACCTACA          | ATAGTTGGCCTCCACCACTGA            |
| <b>Rgs7</b>                    | CCAGTGTGTTCTCCGGGTAGA            | ATGGGCAGCCATTAGCGTTCCC           |
| <b>RIKEN9</b>                  | TTGGCCCTGGAGGCAAGGGG             | TGGGAACCCTGAAGGACCCCA            |
| <b>RIP140</b>                  | TCAAAGCCACACCATACCC              | TCGTCTCCACTGCTGTCATC             |
| <b>SCD1</b>                    | GTACGACTGGGCCCGAGAT              | TGAGGGTCGGCGTGTGT                |
| <b>Slc27a2</b>                 | TGTATGGCGTGCCTGTGCCA             | GAGGCCTCGCGTAACTGGGC             |
| <b><math>\beta</math>3AR</b>   | ATCGTGTCCGCTGCCGT                | ATCTGCCCTTACACGCCAC              |
| <b>Ucp1</b>                    | ACTGCCACACCTCCAGTCATT            | CTTTGCCTCACTCAGGATTGG            |
| <b>Tmem26</b>                  | ACCCTGTCAATCCACAGAG              | TGTTTGGTGGAGTCCCTAAGGTC          |
| <b>Tbx1</b>                    | GGCAGGCAGACGAATGTTC              | TTGTCATCTACGGGCACAAAG            |
